# Supplementary material
Source: PubMed Central journal article supplement (PMC2965730)

## Supplementary Appendix

This appendix has been provided by the authors to give readers additional information about their work.

Supplement to: Zhang Q, Davis JC, Lamborn IT, et al. Combined immunodeficiency associated with *DOCK8* mutations. N Engl J Med 2009;361:2046-55. DOI: 10.1056/NEJMoa0905506.

## **SUPPLEMENTAL METHODS**

### **Cells**

Peripheral blood mononuclear cells (PBMC) were enriched from whole blood using Ficoll-Paque PLUS gradient density centrifugation (GE Healthcare) and ACK lysis buffer (Quality Biological). Cell counts were performed by trypan blue exclusion. Human pan T cell isolation kit II, CD8 T cell isolation kit, or CD4 T cell isolation kit II were used for T cell subset purifications by negative selection (Miltenyi Biotec). Cells at  $2 \times 10^6$ /mL were stimulated with 1  $\mu$ g/mL each of anti-CD3 (OKT3, Ortho Biotech) plus anti-CD28 (BD Biosciences), in RPMI medium supplemented with 10% fetal bovine serum (FBS). After three days, T cells were washed and maintained in 100 IU/mL recombinant human IL-2 (Aldesleukin, Novartis) with fresh medium every three days. Monocytes or B cells were purified from PBMC by negative selection using monocyte isolation kit II or B cell isolation kit II (Miltenyi Biotec). B lymphocytes were immortalized with Epstein-Barr Virus (EBV), and T lymphocytes with Herpes virus saimiri (HVS) according to standard protocols.

### **Comparative genomic hybridization (CGH) analyses**

CGH analyses were performed using 244K arrays, as per manufacturer's instructions with modifications (Agilent Technologies). For each array, equal amounts of patient and reference DNA were prepared in parallel. Briefly, genomic DNA (2-3  $\mu$ g) was digested with Rsa1 and Alu1 restriction enzymes (Promega). Digested DNA was labeled with either cyanine-5-dUTP (patient) or cyanine 3-dUTP (reference) by random priming, using Genomic DNA Labeling kit PLUS (Agilent), and then purified using Vivaspin 500 columns (Sartorius Stedim). Labeled patient and reference DNA were combined with human Cot-1 DNA (Invitrogen), using Agilent aCGH Hybridization kit. Samples were hybridized to arrays while rotating at 65°C for 40 h. Arrays were washed at room temperature for 5 minutes with 0.5x SSC (20x SSC contains 3M NaCl, 0.3 M sodium citrate pH 7.0), 0.005 % Triton X-102 (Sigma-Aldrich), followed by 5

min at 37 °C with 0.1x SSC, 0.005 % Triton X-102. Washed arrays were immediately scanned using an Agilent scanner. Data extraction and analyses were performed using Agilent's Feature Extractor 10.1.1.1 and DNA Analytics 4.0 software packages. Deletions were searched against the Database of Genomic Variants Build 36 (<http://projects.tcag.ca/variation>)

## **DNA Sequencing**

Genomic DNA was isolated from peripheral blood leukocytes, or EBV- or HVS-transformed lymphoblastoid cell lines by DNeasy kit (Qiagen), or was purchased (Coriell Institute). Genomic sequencing was performed after polymerase chain reaction (PCR) amplifying exons with their flanking intronic and/or untranslated regions. In some cases, total RNA was isolated from primary lymphocytes or cultured transformed cell lines by RNeasy kit, with DNaseI in-column digestion (Qiagen). Two  $\mu\text{g}$  of total RNA was reverse-transcribed with Superscript III first-strand synthesis supermix (Invitrogen). cDNA sequencing was performed after PCR amplifying across exons. Genomic DNA (25 ng) or cDNA (1/20 of volume of reverse-transcription reaction) was amplified with 35 cycles (95°C for 30 s, 60-64°C for 30 s, 72°C for 1 min) using FastStart PCR Master (Roche). PCR products were separated on 2% agarose gels in 1x TAE electrophoresis buffer (Tris-acetate-EDTA buffer contains 40 mM Tris-acetate, 1 mM EDTA) and visualized with ethidium bromide. Products were purified using MinElute 96 UF PCR Purification Kit (Qiagen). Primer and template were combined in ABI 96-well Optical Reaction plates, and sequencing reactions were set up using Applied Biosystems BigDye® Terminator v3.1 Cycle Sequencing Kit by adding 1  $\mu\text{l}$  of BigDye® Terminator Ready Reaction Mix v3.1, 3  $\mu\text{l}$  of 5x Sequencing Buffer, and 2  $\mu\text{l}$  of water for a final volume of 10  $\mu\text{l}$ . Cycle sequencing was performed for 27 cycles (96°C for 10 s, 50°C for 5 s, 60°C for 4 min) using a Bio-Rad Tetrad 2 (Bio-Rad Laboratories) or ABI 9700 thermal cycler. Fluorescence-labeled extension products were purified using BigDye® XTerminator™ Purification protocol before processing on an ABI 3730xL DNA Analyzer. The FINCH data management system (Geospiza) was used to store sequence data for all subsequent downstream sequencing analysis

using Sequencher 4.9 software (Gene Codes). Primer sequences for amplification and sequencing are listed in Supplementary Appendix – Table 1. All point mutations detected were confirmed in a second PCR amplification reaction. For confirmation of frameshift mutations, purified PCR-amplified products were cloned using TOPO TA Cloning Kit for Sequencing (Invitrogen). PureLink 96 Plasmid Purification System was used to isolate plasmid DNA from transformed TOP10 *E. coli* colonies (Invitrogen). Sequencing of 44 clones was performed using M13 Forward and Reverse primers, and yielded expected frequencies in patient 7-1 (23 clones with the insertion mutation, 21 clones with the deletion mutation). SNPs were searched against NCBI's dbSNP Build 130 (<http://www.ncbi.nlm.nih.gov/>). Novel variants were sequenced in several control groups, including six *STAT3*-mutant autosomal dominant-HIES, 32 patients with other immunological diseases (non-HIES), 15 healthy donors of varied ethnicities, and 100 healthy Caucasian controls.

All genomic variants are described according to Human Genome Variation Society recommendations (<http://www.hgvs.org/mutnomen/>)<sup>1</sup> using GenBank Reference Sequences NC\_000009.10 (DNA), NM\_203447.2 (mRNA), and NP\_982272.2 (protein) based on NCBI Build 36.3. Coding DNA variations are described with the A of the ATG translation initiation codon designated as nucleotide +1.

### **Quantitative real-time RT-PCR**

Total RNA was isolated from primary lymphocytes or cultured transformed cell lines by RNeasy kit, with DNaseI in-column digestion (Qiagen). One  $\mu$ g of total RNA was reverse-transcribed with Superscript III first-strand synthesis supermix (Invitrogen). Appropriately diluted cDNA was analyzed by quantitative real-time PCR with SYBR Green dye on a 7500 Real Time PCR System (Applied Biosystems). Standard conditions of 40 cycles (95°C for 15 s, 60°C for 1 min) were used. The quantity of RNA was calculated from the cycle number by using primer-specific standard curves. Expression of DOCK8 was normalized to the housekeeping gene  $\beta$ -actin. Primer sets designed to span exon junctions are listed in Supplemental Table 1.

## **Immunoblotting**

Cells were lysed in 1% NP-40, 150 mM NaCl, 50 mM Hepes pH 7.4, 1 mM EDTA, and complete protease inhibitor (Roche). Protein lysates (100-200  $\mu$ g) in 5%  $\beta$ -mercaptoethanol were separated on 3-8% Tris acetate gels in Tris-acetate sodium dodecyl sulfate (SDS) buffer (Invitrogen). Samples were transferred to nitrocellulose overnight at 4°C, blocked with 5% non-fat dry milk in PBS containing 0.1% Tween-20, incubated with polyclonal rabbit anti-DOCK8 (Sigma-Aldrich, or the kind gift of Dr. Ruusala, Ludwig Cancer Institute, Uppsala, Sweden<sup>2</sup>) or mouse anti- $\beta$ -actin antibodies (Sigma-Aldrich) on the same blot. Following incubation with horseradish peroxidase-conjugated anti-rabbit Ig or anti-mouse IgG1 (Southern Biotechnology), signal was developed with Supersignal West chemiluminescent substrate (Thermo Scientific), and exposed to film.

## **Flow cytometry**

Except where otherwise indicated, all antibodies and buffers were from BD Biosciences. Samples were acquired on BD FACSCanto or BD FACSCalibur instruments using FACSDiva or CellQuest Pro software (BD Biosciences). Analyses were performed using the FlowJo software package versions 8.7.3 or higher (TreeStar).

Standard flow cytometry methods were used for cell-surface marker staining. PE anti-CD25, PE-Cy5 anti-CD4, APC-Cy7- or APC- anti-CD8 antibodies were purchased from BD Biosciences. For carboxyfluorescein succinimidyl ester (CFSE) dilution assays, cells at  $10^7$ /mL in PBS were labeled with 2.5  $\mu$ M CFSE (Invitrogen) for 15 min in the dark, washed in the presence of FBS, and resuspended at  $2 \times 10^6$ /mL. Cells were harvested for CFSE analysis after three days of culture under conditions of anti-CD3 plus anti-CD28 stimulation, or no stimulation.

For detection of intracellular cytokines, purified T cells were incubated at 37°C overnight and resuspended at  $2 \times 10^6$  cells/ml in RPMI supplemented with 10% FBS. Cells were either left unstimulated, or stimulated with 10 ng/mL phorbol myristate acetate (PMA) plus 500 ng/ml

ionomycin (Calbiochem) at 37°C for 2 h. GolgiPlug™ was added at a final concentration of 1:1000 for an additional 4 h. Cells were incubated with PE Cy5 anti-CD45RO and APC Cy7 anti-CD8 antibodies for 20 min at 4°C, in the presence of 1% FCS, 0.09% sodium azide, followed by Cytotfix/Cytoperm for 20 min at 4°C. Washed cells were resuspended in Perm/Wash buffer and incubated with optimally titrated FITC anti-IFN- $\gamma$  and PE Cy7 anti-TNF- $\alpha$  antibodies for 1 h at 4°C in the dark. Cells were sequentially washed with perm/wash buffer and PBS, resuspended in PBS, and acquired on the flow cytometer.

For enumeration of regulatory T cells, Human Regulatory T cell Staining Kit #2 (eBioscience) was used. Briefly, after cell surface staining with PE anti-CD4 and FITC anti-CD25, freshly isolated PBMC were treated with Fixation/Permeabilization buffer for 45 min at 4°C. After washing with Permeabilization buffer, cells were incubated with APC anti-FoxP3 for 1 hour at 4°C. After additional washes, cells were resuspended in PBS and acquired on the flow cytometer.

For detection of intracellular perforin, after cell surface staining with APC anti-CD8-antibodies, cells were incubated with 4% paraformaldehyde in PBS for 20 min at 4°C. Fixed cells were washed with permeabilization buffer (0.1% saponin, 0.1% BSA, 1 mM CaCl<sub>2</sub>, 1 mM MgSO<sub>4</sub>, 0.05% sodium azide, 10 mM HEPES pH 7.4) and incubated with PE-anti-perforin antibodies or isotype control for 1 h at 4°C in the dark. After additional washes, cells were resuspended in PBS and acquired on the flow cytometer.

For detection of degranulation, CD8 T cells were used as effectors after initial activation and culture for 14 days. P815 target cells were washed with PBS, labeled with 2.5  $\mu$ M CFSE for 10 min at room temperature in the dark, and washed with medium containing FBS. Labeled target cells were pre-incubated with anti-CD3 antibodies for 20 min at room temperature before adding to effector cells. Target and effector cells were incubated together, each at a concentration of  $5 \times 10^5$  cells/mL. Cells were incubated in the presence of 100 ng/mL of anti-CD3 antibodies, 100 U/mL of IL-2, APC anti-CD107 antibodies, and GolgiStop™ at a final

concentration of 1:816, for 2 h at 37°C. Cells were stained with FITC-anti-CD8 antibodies before being acquired on the flow cytometer.

### **Contributions**

H.C.S. designed this study. The patients were recruited and studied under immunodeficiency and hyper-IgE screening and natural history protocols designed by S.M.H., and were also studied under a lymphocyte homeostasis screening protocol designed by H.C.S. as part of the Lymphocyte Molecular Genetics Unit (LMGU) program. Q.Z., J.C.D., I.T.L., A.F.F., H.J., A.J.F., H.F.M., J.D., G.U., S.M.H., and H.C.S. gathered the data. Q.Z., J.C.D., I.T.L., A.F.F., H.J., G.U., and H.C.S. analyzed the data. H.C.S. vouches for the data and the analysis. The initial draft of the paper was written by H.C.S with significant contribution from J.C.D. H.C.S. and S.M.H. decided to publish the paper. There were no confidentiality agreements between the authors and the NIH, the sponsor of the study. No outside editorial assistance was provided to the authors.

## Supplemental figure legends

Figure S1. Regulatory T cells. Shown are flow cytometric profiles depicting the FoxP3<sup>+</sup> CD25<sup>hi</sup> subset in gated CD4 T lymphocytes for patients 1-1 (A) and 4-2 (B); percentages indicate T<sub>reg</sub> cells as a proportion of the CD4 T cells. C, healthy control. Pt, patient. The percentages of T<sub>reg</sub> as a proportion of lymphocytes in (A) were 3.3, 3.3, and 1.4 for C1, C2, and Pt 1-1, respectively; and in (B), 2.8, 3.3, 3.5, and 3.1 for C1, C2, C3, and Pt 4-2, respectively.

Figure S2. *DOCK8* molecular analyses. (A) Shown for each proband is a pictorial representation of Log<sub>2</sub> ratios (x-axis) of patient DNA/reference DNA after hybridization to probes at or near the *DOCK8* locus, vs. genomic position (y-axis). Green crosses indicate probes where the signal of the log<sub>2</sub> ratio was less than zero, and the red crosses more than zero. Arrows pointing to the shaded regions indicate homozygous or heterozygous *DOCK8* deletions. (B) Sequence chromatograms for the point mutations in proband and corresponding normal sequence in a healthy control. A vertical arrow indicates the location where a base change(s) occurs in patient as compared to control. Horizontal arrow indicates beginning of exon 6. Horizontal bar for allele II in patient 7-1 indicates the inserted bases. The corresponding amino acid changes for the patients are shown below in red. (C) *DOCK8* structural variants and point mutations. Variants are aligned against the protein (NP\_982272.1; grey, top) and genomic DNA (NC\_000009.10; boxes indicate exons) sequences. Bars designate deletions, with coordinates taken from oligonucleotide probes or by sequencing across the deletion. Bars are dotted where a breakpoint occurs between two adjacent probes. Symbols designate point mutations, with predicted effects on protein coding indicated. CDS, coding sequence. DHR, *DOCK* homology region. Note that (C) is not drawn to scale.

Figure S3. *DOCK8* exons 10 through 23 are deleted in patient 1-1. (A) Exon-specific primers were used for PCR amplifications from genomic DNA isolated from peripheral T cells of healthy



controls (C1, C2), patient (1-1), or no template (-) control. PCR products were separated by gel electrophoresis. (B) A unique 1047 bp crossover PCR product spanning the deletion was amplified from genomic DNA isolated from EBV- or HVS- transformed patient cell lines, as well as peripheral T cells from parents (P1, P2), but not healthy control (C) or no template (-) control. (C) Sequence chromatogram showing exact breakpoints of deletion. A line identifies the overlapping region where intron 9 joins intron 23 in the PCR amplified product.

Figure S4. *DOCK8* exons 5 through 24 are deleted in patient 2-1. (A) Exon-specific primers were used for PCR amplifications from genomic DNA isolated from peripheral T cells of healthy controls (C1, C2), neutrophils of patient (2-1), or no template (water) control. PCR products were separated by gel electrophoresis. (B) A unique crossover PCR product spanning the deletion was amplified from genomic DNA isolated from patient 2-1, but not healthy control (C). (C) Sequence chromatogram showing exact breakpoints of deletion. A line identifies the overlapping region where intron 4 joins intron 24 in the PCR amplified product.

Figure S5. Abnormal *DOCK8* splicing in patients 3-1 and 6-1. (A) Primers were used for PCR amplification from exon 5 to exon 8 of cDNA prepared from EBV lines of healthy controls (C1, C2), patient 3-1, patient 6-1, and a parent (P). PCR products were separated by gel electrophoresis. Both patient 3-1 and parent P carry the c.538-15T>G intron 5 splice mutation. Patient 6-1 carries the c.538-18C>G intron 5 splice mutation. (B) Sequence chromatograms showing splice junctions for the PCR amplified products. The 205 bp band found in patients 3-1 and 6-1 corresponds to an aberrantly spliced product in which exon 5 skips exon 6 and instead joins to exon 7, resulting in an out-of-frame premature termination. The corresponding amino acid changes for the patients are shown below in red. The 290 bp band corresponds to normally spliced product in which exons 5, 6, 7, and 8 are sequentially spliced together.

Figure S6. (A) DOCK8 mRNA expression in leukocyte subsets from healthy blood donors. Quantitative real-time RT-PCR was used to measure DOCK8 mRNA, normalized to  $\beta$ -actin, in various leukocyte subsets and cell lines: freshly isolated monocytes (95%, n=3), T cells (95%, n=3), CD8 T cells (81%, n=1), CD4 T cells (88%, n=1), and B cells (95%, n=4), at indicated purities; activated peripheral blood T cells expanded in IL-2 after stimulation with anti-CD3 plus anti-CD28, cultured for indicated number of total days (n=1); and EBV- (n=3) or HVS- (n=2) transformed cell lines. Standard deviations are shown where three or more samples were tested. (B) DOCK8 mRNA expression in lymphocytes from patients. Quantitative real-time RT-PCR utilizing primer set A or B was used to measure DOCK8 mRNA, normalized to  $\beta$ -actin, in primary T cells (previously activated with anti-CD3 plus anti-CD28 and expanded in culture with IL-2), HVS-transformed T cells, and EBV-transformed B cells. C, healthy control; Pt, patient. (C) Schematic diagram with bars showing locations on mRNA targeted by RT-PCR primer sets. CDS, coding sequence.

Figure S7. DOCK8 protein expression in patients 1-1, 2-1, 5-1, and 5-2. Immunoblotting was performed on lysates from control (C1, C2, C3), patients 2-1, 5-1, and 5-2 HVS-transformed T cells (A), or lysates from control or patient 1-1 primary T cells (B). Antibodies to DOCK8 or  $\beta$ -actin were used. Arrow indicates residual protein of altered mobility consistent with deletion A.

Figure S8. DOCK8 deficiency impairs CD8 T cell proliferation. (A) After activation of PBMC with anti-CD3 plus anti-CD28 for 3 days, T cells were expanded in culture with IL-2. Absolute numbers of CD8 T cells were calculated based upon flow cytometric determinations of their percentages. CD8 T cell numbers over time were graphed as fold-increases normalized to the pre-stimulated population. (B) CD4 T cell numbers from the experiments in (A) were similarly analyzed. (C, D) Flow cytometric plots of CFSE-labeled PBMC either unstimulated or stimulated as in (A). After 3 days, cells were stained for T cell subset markers and CFSE dilution assessed by flow cytometry. Shown are CFSE dilutions of gated CD8 T cells (C) or

gated CD4 T cells (C, D). Grey shaded peak, unstimulated; blue line, with stimulation. C, healthy control; P, parent. Results for family 1 are representative of two independent experiments; results for families 4, 5, and 8 represent one experiment each.

Figure S9. CD25 induction, cytokine production, and perforin expression by DOCK8-deficient CD8 T cells. (A) CD25 expression was evaluated on gated CD8 T cells by flow cytometry 3 days after stimulating PBMC with anti-CD3 plus anti-CD28 antibodies. Median Fluorescence Intensities (MFI) are indicated on plots. Grey shaded peak, unstimulated; blue line, with stimulation. C, healthy control; Pt, patient. Results for Patient 1-1 are representative of two experiments. Results for patient 8-2 are from one experiment. (B) Ex vivo intracellular IFN- $\gamma$  or TNF- $\alpha$  expression in gated CD8 T cells, as assessed by flow cytometry after PMA plus ionomycin restimulation. Percent positive are indicated on plots. Similar results were obtained for patient 5-2. Grey shaded peak, isotype control; blue line, cytokine. (C) MFI for perforin expression in gated CD8 T cells after expansion in culture for 14 days, as assessed by flow cytometry. (D) CD107a surface expression after degranulation, showing percent positive in gated CD8 T cells. Line indicates geometric mean. Healthy control, ●; patient 5-1, ✕; patient 5-2, ▽; patient 6-1, ◆; patient 8-2, ▲.

## **Supplemental References**

1. den Dunnen JT, Antonarakis SE. Mutation nomenclature extensions and suggestions to describe complex mutations\_ A discussion. *Hum Mutat* 2000;15:7-12.
2. Ruusala A, Aspenstrom P. Isolation and characterisation of DOCK8, a member of the DOCK180-related regulators of cell morphology. *FEBS Lett* 2004;572:159-66.

# Supplemental Table 1

|                                                        | 5' Primer Sequence           |                   | 3' Primer Sequence          |
|--------------------------------------------------------|------------------------------|-------------------|-----------------------------|
| <b>Genomic Sequencing (PCR and Sequencing Primers)</b> |                              |                   |                             |
| DOCK8exon1F                                            | ACTTCGAAACCACTTCTGCC         | DOCK8exon1R       | TGGCATGGAAGTTACCTCC         |
| DOCK8exon2F                                            | TTGCCTTTGTGCTTTTACCAG        | DOCK8exon2R       | GGCATCTCCCCTACCCAC          |
| DOCK8exon3F                                            | TTGGAATGATTGGGCAAGAAC        | DOCK8exon3R       | TGTGTGTGATATGGAGTGGGG       |
| DOCK8exon4F                                            | TCTAATGGTTTGCCGCTCTC         | DOCK8exon4R       | CCCTGGGCAGAAGAGCC           |
| DOCK8exon5F                                            | CCCAAATTGGAGCAGTCTTG         | DOCK8exon5R       | AATAATGAACAACAATGTCCAC      |
| DOCK8exon6F                                            | TTAACTTGAGCCGTGGAGGG         | DOCK8exon6R       | GAAGAATGACCATCAAGAAGTTGG    |
| DOCK8exon7F                                            | TCCAAATATTTCCGGAAACTGC       | DOCK8exon7R       | TCAAATCTGATAGGTTCTTGCTGC    |
| DOCK8exon8F                                            | TTTAAACCATGAATGCAACAGG       | DOCK8exon8R       | TGTGCTGGGAACAACACAGC        |
| DOCK8exon9F                                            | AGCTTCCTATGTCATCAAATTTGTC    | DOCK8exon9R       | GGGACACATTAGGGACATAAGCC     |
| DOCK8exon10F                                           | AGGCAGTTGACTTGGTGCTG         | DOCK8exon10R      | AGTAAGCTGTGGACCTGGGC        |
| DOCK8exon11F                                           | TGGCCATATTCAGTGTCTCTG        | DOCK8exon11R      | ATCCTCCTCCTGTGGGTTCC        |
| DOCK8exon12F                                           | TCCAGAAATCGTTTGTCCC          | DOCK8exon12R      | TGTGTCTAACGATAAGCAGTTTTGG   |
| DOCK8exon13F                                           | CTGCTAGCAATGCAGGGAAG         | DOCK8exon13R      | ACGGTTTTCCAAGAACCTGC        |
| DOCK8exon14F                                           | AAGCACCCCATGAATGGAAG         | DOCK8exon14R      | TCCCGGACTTGTGTGAAGTG        |
| DOCK8exon15F                                           | ACATCCTGTTGGCCTGATG          | DOCK8exon15R      | AAAACCAGGAGATGATGAAACC      |
| DOCK8exon16F                                           | GGCTGTGGCGTTTTACAATC         | DOCK8exon16R      | CTGCAGGGACCTCAGATGC         |
| DOCK8exon17F                                           | TTGCAATTTGATTATTGCGAGC       | DOCK8exon17R      | CCACATGGGAATGGAAGTG         |
| DOCK8exon18F                                           | GGGCTCCTGACTCCAAGAAC         | DOCK8exon18R      | AGAGGTTTGCATGTCCCCAC        |
| DOCK8exon19F                                           | CTTCTGGTCTGAAACGCTGG         | DOCK8exon19R      | GCACACATCATCAGTGGAAAGG      |
| DOCK8exon20F                                           | AAACTTCCACCTCAGGCTCC         | DOCK8exon20R      | ACTGCAGTGGGGTGGAGG          |
| DOCK8exon21F                                           | GCTTTTCATCCACCCTATCCC        | DOCK8exon21R      | GTGGGCAGCAGTAGTGGTTG        |
| DOCK8exon22F                                           | TCCAGATGTCTGGCTTACCTTTC      | DOCK8exon22R      | CACAGTGTGAGGGCATGAGG        |
| DOCK8exon23F                                           | GAACATCTAAGACACATGCTTCAGG    | DOCK8exon23R      | CAGCAGGGGCAACTCAGTG         |
| DOCK8exon24F                                           | GCACCACCAGCACAGATAAAG        | DOCK8exon24R      | CCACATCAGGGTCCAGTCC         |
| DOCK8exon25F                                           | CCCACCAGTGACCTGGAAG          | DOCK8exon25R      | CGAACATCACATTATATGAGAAGGAAC |
| DOCK8exon26F                                           | GCCAACTCAACTCCACTTACC        | DOCK8exon26R      | GCTAGTGGTGTAACTTCAGGGTAGC   |
| DOCK8exon27F                                           | TGGCCATCGCTATTTTCATTC        | DOCK8exon27R      | TTTACCAAGTGTGAGAAGCTAGACTG  |
| DOCK8exon28F                                           | TGCTTGGTTTTACAGTCACC         | DOCK8exon28R      | CAGCACTGGAACGAATGACAG       |
| DOCK8exon29F                                           | GTAGGGGACATGGGGAAATG         | DOCK8exon29R      | GCTGAGGCATGAAGAACCC         |
| DOCK8exon30F                                           | GATCTCCAGCCTAGCAGTGATG       | DOCK8exon30R      | CTCCATGGCCCAACAAG           |
| DOCK8exon31F                                           | TTAGCTGGCATCACTGTGGAG        | DOCK8exon31R      | GGACATTCCTCCCCACAAAC        |
| DOCK8exon32F                                           | TTCTGGTTATCTTGGAGGGTTTC      | DOCK8exon32R      | TCAGTAATACAAGCAGCCTGGG      |
| DOCK8exon33F                                           | CCATCATGGGAACCTGGC           | DOCK8exon33R      | TGGGATCACATTATGTCTTTAC      |
| DOCK8exon34F                                           | CACCTGAGCATGGAACATCAGC       | DOCK8exon34R      | CTGTGACTTTTGGTCCACTG        |
| DOCK8exon35F                                           | ATTTCAACGGTCCAGAAAGTG        | DOCK8exon35R      | TTTTCGCAGCTGATGCTTTAC       |
| DOCK8exon36F                                           | TGGCCATGCTGCTTTCAG           | DOCK8exon36R      | CATACACAATAGTTGGCAGATCCC    |
| DOCK8exon37F                                           | AATCCTAACTCTTACCTGGGAC       | DOCK8exon37R      | AGTGACAATCCTCGACCCC         |
| DOCK8exon38F                                           | AAAAGGTCACACAAAGTAGAAGAAGCAG | DOCK8exon38R      | GACAAAATCGCCCCAGTTG         |
| DOCK8exon39F                                           | ATTCGGGGTTCCTGTGGTC          | DOCK8exon39R      | CCAGCACCCCAAGTCCAG          |
| DOCK8exon40F                                           | GGACAATGACCTCTGGTTGC         | DOCK8exon40R      | ATCTGTAGGACAGGGTCCGC        |
| DOCK8exon41F                                           | CACAATGAGAGACCCTGCC          | DOCK8exon41R      | TGGTGATGACCCACTTAAGTTG      |
| DOCK8exon42F                                           | TCACTTCCAAGAAGACAAAGAGTTG    | DOCK8exon42R      | TTCTTGGGTAGAGAACGAAGGG      |
| DOCK8exon43F                                           | TCCATTGCGTCAGGGATG           | DOCK8exon43R      | GTTTGTGGGTCTCTCTGGG         |
| DOCK8exon44F                                           | TGGCCTCTGTGCATAGCTCC         | DOCK8exon44R      | AAGGAAGAAGGGTGCAGACG        |
| DOCK8exon45F                                           | TGAGATGTCCAAGACCTTCTTT       | DOCK8exon45R      | GGTGCCTGAGACTTTGTCTTTC      |
| DOCK8exon46F                                           | AGGTGATCCCGATATGCCAC         | DOCK8exon46R      | TGACTGTGGGACCCTCTTCC        |
| DOCK8exon47-1F                                         | TGATCTTTCTTGTCTGTACGC        | DOCK8exon47-1R    | ACTCCAATAAATCAAATATGGGC     |
| DOCK8exon47-2F                                         | TCCACAATGTACCAACAAGGC        | DOCK8exon47-2R    | TCCATTTAAGTGAAGCAGTATCTGTG  |
| <b>RT-PCR</b>                                          |                              |                   |                             |
| DOCK8rt-A-F                                            | TCAGCCTCTGTGGGTAGACA         | DOCK8rt-A-R       | CCGCACAAAGAGATTTTGGGA       |
| DOCK8rt-B-F                                            | ACGCGCCGTGTAACCTGTGAA        | DOCK8rt-B-R       | CCCCGAGCTCTGGGCAA           |
| <b>Cross-PCR for Pt 1-1</b>                            |                              |                   |                             |
| Pt1-1cross-1F                                          | GCAAGGCCACCCCCTGTTGT         | Pt1-1cross-1R     | TTGCCCTACCCCAGCTCCC         |
| <b>Cross-PCR for Pt 2-1</b>                            |                              |                   |                             |
| DOCK8300919i4.10F                                      | TGTCAAAAACAATATGGCAAAGC      | DOCK8388330i24.2R | GGGACCTGATAAAGAGGTTGC       |
| <b>cDNA Splice Site for Pt 3-1 and Pt 6-1</b>          |                              |                   |                             |
| DOCK8 RTex6_1F                                         | GGACTTTGAGAAGCAGAACG         | DOCK8 RTex6_2R    | GCAGAAATCCTTTGAAGTGG        |
| <b>Controls</b>                                        |                              |                   |                             |
| Beta actin F                                           | CCTCACCTGAAGTACCCCA          | Beta actin R      | TCGTCCCAGTTGGTGACGAT        |

| Supplemental Table 2. Characteristics of Patients |                                                                                     |                                                                                                                                                                                                                                                                             |                                                                                                             |                                                                              |                                                                             |                                                                                                                                           |                                                                                                                            |                                                                 |                                                                                                                                 |                                                                                                                                                                      |                                                                                             |
|---------------------------------------------------|-------------------------------------------------------------------------------------|-----------------------------------------------------------------------------------------------------------------------------------------------------------------------------------------------------------------------------------------------------------------------------|-------------------------------------------------------------------------------------------------------------|------------------------------------------------------------------------------|-----------------------------------------------------------------------------|-------------------------------------------------------------------------------------------------------------------------------------------|----------------------------------------------------------------------------------------------------------------------------|-----------------------------------------------------------------|---------------------------------------------------------------------------------------------------------------------------------|----------------------------------------------------------------------------------------------------------------------------------------------------------------------|---------------------------------------------------------------------------------------------|
| Variable                                          | Patient 1-1                                                                         | Patient 2-1                                                                                                                                                                                                                                                                 | Patient 3-1                                                                                                 | Patient 4-1                                                                  | Patient 4-2                                                                 | Patient 5-1                                                                                                                               | Patient 5-2                                                                                                                | Patient 6-1                                                     | Patient 7-1                                                                                                                     | Patient 8-1                                                                                                                                                          | Patient 8-2                                                                                 |
| Age (yr)                                          | 6                                                                                   | 21†                                                                                                                                                                                                                                                                         | 18†                                                                                                         | 17                                                                           | 14                                                                          | 21                                                                                                                                        | 14                                                                                                                         | 14                                                              | 13†                                                                                                                             | 18†                                                                                                                                                                  | 16                                                                                          |
| Sex                                               | female                                                                              | male                                                                                                                                                                                                                                                                        | female                                                                                                      | male                                                                         | female                                                                      | female                                                                                                                                    | female                                                                                                                     | male                                                            | female                                                                                                                          | female                                                                                                                                                               | male                                                                                        |
| Ethnicity                                         | Yemeni                                                                              | Lebanese                                                                                                                                                                                                                                                                    | Caucasian                                                                                                   | Caucasian                                                                    | Caucasian                                                                   | Caucasian                                                                                                                                 | Caucasian                                                                                                                  | Caucasian                                                       | Caucasian                                                                                                                       | Mexican                                                                                                                                                              | Mexican                                                                                     |
| Atopy                                             |                                                                                     |                                                                                                                                                                                                                                                                             |                                                                                                             |                                                                              |                                                                             |                                                                                                                                           |                                                                                                                            |                                                                 |                                                                                                                                 |                                                                                                                                                                      |                                                                                             |
| Atopic dermatitis                                 | (+)                                                                                 | (+)                                                                                                                                                                                                                                                                         | (+)                                                                                                         | (+)                                                                          | (+)                                                                         | (+)                                                                                                                                       | (+)                                                                                                                        | (+)                                                             | (+)                                                                                                                             | (+)                                                                                                                                                                  | (+)                                                                                         |
| Allergies                                         | Food - beef, cow's milk, egg, sesame; Environmental - Bermuda grass, mountain cedar | Food - avocado, banana, beef, cantaloupe, carrot, cow's milk, cucumber, egg, kiwi, lamb, lentil, mango, mustard, pea, pineapple, pistachio, pomegranate, salmon, sesame, shrimp, watermelon, wheat, yeast*; Environmental - seasonal rhinitis to Alternaria, ragweed, trees | Food - catfish, eggs, peanuts, shellfish*                                                                   | Drug - cefaclor                                                              | Drug - penicillin                                                           | Food - apple, corn, cow's milk, egg, fish, shellfish, soy, tree nuts, wheat; Drug - penicillin, sulfa; Environmental - grass, trees, pets | Food - cow's milk, egg, legumes, peanuts, tree nuts*; Drug - clarithromycin, penicillin, sulfa; Environmental - cat, grass | Food - crab, egg, tree nuts*; Environmental - seasonal rhinitis | Food - bananas, beans, cow's milk, goat's milk, onion, peanut, soy, tuna*; Drug - sulfa                                         | Food - beans, beef, chicken, cow's milk, egg, fish, peanut, pork, tree nuts, tomato*; Drug - Cefipime, Lactinex, Propofol*; Environmental - dust, dog, grasses, mold | Food - beef, chicken, cow's milk, egg, peanut, pork*; Environmental - dust, dog, mold       |
| Asthma                                            | (-)                                                                                 | (+)                                                                                                                                                                                                                                                                         | (+)                                                                                                         | (+)                                                                          | (+)                                                                         | (+)                                                                                                                                       | (+)                                                                                                                        | (-)                                                             | (-)                                                                                                                             | (-)                                                                                                                                                                  | (-)                                                                                         |
| Infections                                        |                                                                                     |                                                                                                                                                                                                                                                                             |                                                                                                             |                                                                              |                                                                             |                                                                                                                                           |                                                                                                                            |                                                                 |                                                                                                                                 |                                                                                                                                                                      |                                                                                             |
| Skin and soft tissue                              | Diaper cellulitis                                                                   | <i>Staphylococcus aureus</i> skin abscesses, axillary lymphadenitis, otitis externa                                                                                                                                                                                         | <i>Staphylococcus aureus</i> skin abscesses, otitis externa                                                 | (-)                                                                          | (-)                                                                         | <i>Staphylococcus aureus</i> skin abscesses                                                                                               | <i>Staphylococcus aureus</i> impetigo and skin infections, otitis externa                                                  | Skin abscesses, impetigo                                        | <i>Staphylococcus aureus</i> skin abscesses, otitis externa                                                                     | <i>Staphylococcus aureus</i> skin infections, otitis externa                                                                                                         | <i>Staphylococcus aureus</i> skin infections, <i>Acinetobacter baumannii</i> otitis externa |
| Respiratory tract                                 | Recurrent otitis media, pneumonias¶§                                                | Recurrent otitis media, sinusitis, adenoviral pneumonia¶§                                                                                                                                                                                                                   | <i>Streptococcus pneumoniae</i> , non-typeable <i>Haemophilus influenzae</i> , RSV pneumonias; otitis media | Recurrent otitis media, sinusitis, bronchitis, croup¶§                       | Recurrent otitis media, sinusitis, pneumonias, bronchitis¶§                 | Recurrent otitis media, sinusitis, mastoiditis, pneumonias including <i>Pneumocystis jirovecii</i> ¶§                                     | Recurrent otitis media, sinusitis, <i>Pneumocystis jirovecii</i> and <i>Haemophilus influenzae</i> pneumonias¶             | Recurrent otitis media, sinusitis¶                              | Recurrent pneumonias, mastoiditis                                                                                               | (-)                                                                                                                                                                  | Otitis media, sinusitis, pneumonia                                                          |
| Viral infections                                  | Recurrent orolabial HSV•                                                            | Diffuse flat warts, herpes zoster                                                                                                                                                                                                                                           | HSV - keratitis, eczema herpeticum, recurrent genital infections; diffuse molluscum contagiosum             | Diffuse flat warts, diffuse molluscum contagiosum, severe primary varicella• | Recurrent orolabial HSV, diffuse flat warts, diffuse molluscum contagiosum• | Diffuse molluscum contagiosum, verrucous warts on fingers, recurrent herpes zoster•                                                       | Diffuse flat warts, persistent orolabial HSV                                                                               | Flat and verrucous warts on face, trunk, extremities•           | HSV - keratitis, eczema herpeticum, recurrent orolabial, eyelid, ear canal, and genital infections; Verrucous warts on fingers• | HSV keratitis, eczema herpeticum, herpes zoster                                                                                                                      | HSV keratitis and groin infection, eczema herpeticum, diffuse molluscum contagiosum•        |
| Other                                             | Oral candidiasis, tooth decay                                                       | Pericarditis                                                                                                                                                                                                                                                                | Salmonella enteritis, giardiasis, <i>Staphylococcus aureus</i> osteomyelitis, vaginal candidiasis           | (-)                                                                          | Salmonella enteritis                                                        | Oral candidiasis                                                                                                                          | Oral candidiasis                                                                                                           | <i>Staphylococcus aureus</i> osteomyelitis, nail candidiasis    | Vaginal candidiasis                                                                                                             | <i>Haemophilus influenzae</i> and cryptococcal meningitis; recurrent <i>Staphylococcus aureus</i> and <i>Acinetobacter baumannii</i> sepsis                          | (-)                                                                                         |
| Malignancies                                      | (-)                                                                                 | Metastatic anal squamous cell carcinoma                                                                                                                                                                                                                                     | Paranasal and vulvar squamous cell carcinomas; cutaneous T-cell lymphoma                                    | (-)                                                                          | (-)                                                                         | (-)                                                                                                                                       | (-)                                                                                                                        | (-)                                                             | Vulvar squamous cell carcinoma                                                                                                  | (-)                                                                                                                                                                  | (-)                                                                                         |
| Additional history                                | Poor growth, high forehead, thinning hair                                           | Eosinophilic esophagitis, eosinophilic dermatitis, eosinophilic lung disease, bronchiectasis, hypospadias                                                                                                                                                                   | Poor growth                                                                                                 | Cavernous angioma                                                            | (-)                                                                         | Eosinophilic esophagitis, bronchiectasis and lung cyst, high-arched palate, hyperextensibility                                            | High-arched palate, minimal trauma fracture                                                                                | Bronchiectasis, scoliosis, high-arched palate                   | Retained primary teeth, pneumatocele, poor growth                                                                               | Delayed puberty                                                                                                                                                      | Retained primary teeth                                                                      |
| HIES score <sup>a</sup>                           | 40                                                                                  | Not done                                                                                                                                                                                                                                                                    | Not done                                                                                                    | 27                                                                           | 30                                                                          | 33                                                                                                                                        | 62                                                                                                                         | 42                                                              | 61                                                                                                                              | 54                                                                                                                                                                   | 42                                                                                          |

† deceased

\* anaphylaxis

¶ tympanostomy tubes

§ sinus surgery

• IFN- $\alpha$  treatment

<sup>a</sup> of maximal score of 111 (without age correction); scoring criteria according to Grimbacher B, Schäffer AA, Holland SM, et al. Genetic linkage of hyper-IgE syndrome to chromosome 4. Am J Hum Genet 1999;65:735-44.

| <b>Supplemental Table 3. Specific antibody function of patients.</b> |                    |                    |                    |                    |                    |                    |                    |                    |                    |                    |                    |
|----------------------------------------------------------------------|--------------------|--------------------|--------------------|--------------------|--------------------|--------------------|--------------------|--------------------|--------------------|--------------------|--------------------|
| <b>Specific antibodies to</b>                                        | <b>Patient 1-1</b> | <b>Patient 2-1</b> | <b>Patient 3-1</b> | <b>Patient 4-1</b> | <b>Patient 4-2</b> | <b>Patient 5-1</b> | <b>Patient 5-2</b> | <b>Patient 6-1</b> | <b>Patient 7-1</b> | <b>Patient 8-1</b> | <b>Patient 8-2</b> |
| Tetanus toxoid                                                       | (-)                | (-)                | (-)                | (+)                | (+)                | (-)                | (-)                | (-)                | (+)                | (-)                | (-)                |
| Diphtheria                                                           |                    | (-)                | (-)                | (+)                | (+)                | (-)                | (-)                | (+)                | (-)                | (+)                | (+)                |
| Pneumococcal†                                                        | 20/23              |                    | 1/3                | 21/23              | 20/23              | 1/23               | 23/23              | 7/23               |                    | 5/23               | 10/23              |
| Rubella                                                              | (+)                |                    | (+)                | (+)                | (+)                | (+)                | (+)                | (+)                |                    |                    | (+)                |
| <i>Haemophilus influenzae</i><br>type B                              | (+)                | (-)                |                    | (+)                | (+)                | (-)                | (+)                | (-)                |                    | (-)                | (+/-)              |
| Varicella-zoster virus                                               | (+)                |                    | (+)                |                    |                    | (+)                | (+)                |                    |                    |                    |                    |
| Measles                                                              |                    |                    | (-)                |                    |                    |                    |                    |                    |                    | (-)                |                    |
| Poliovirus                                                           | (-)                |                    | (-)                |                    |                    |                    |                    |                    |                    |                    |                    |
| Bacteriophage øX174                                                  |                    |                    |                    | (-)                | (-)                |                    |                    |                    |                    |                    |                    |
| Mumps                                                                |                    |                    | (-)                |                    |                    |                    |                    |                    |                    |                    |                    |
| Hepatitis B virus                                                    |                    |                    |                    |                    |                    |                    |                    |                    | (+)                |                    | (-)                |
| Started on IVIG                                                      | no                 | yes                | no                 | yes*               | yes*               | yes                | yes                | no                 | no                 | yes                | no                 |

(-), (+), (+/-) indicate whether protective levels of antibodies were absent, present, or indeterminate, respectively

†Number of serotypes showing positive response of those tested

\*IVIG trial not continued

# Supplemental Figure 1

A

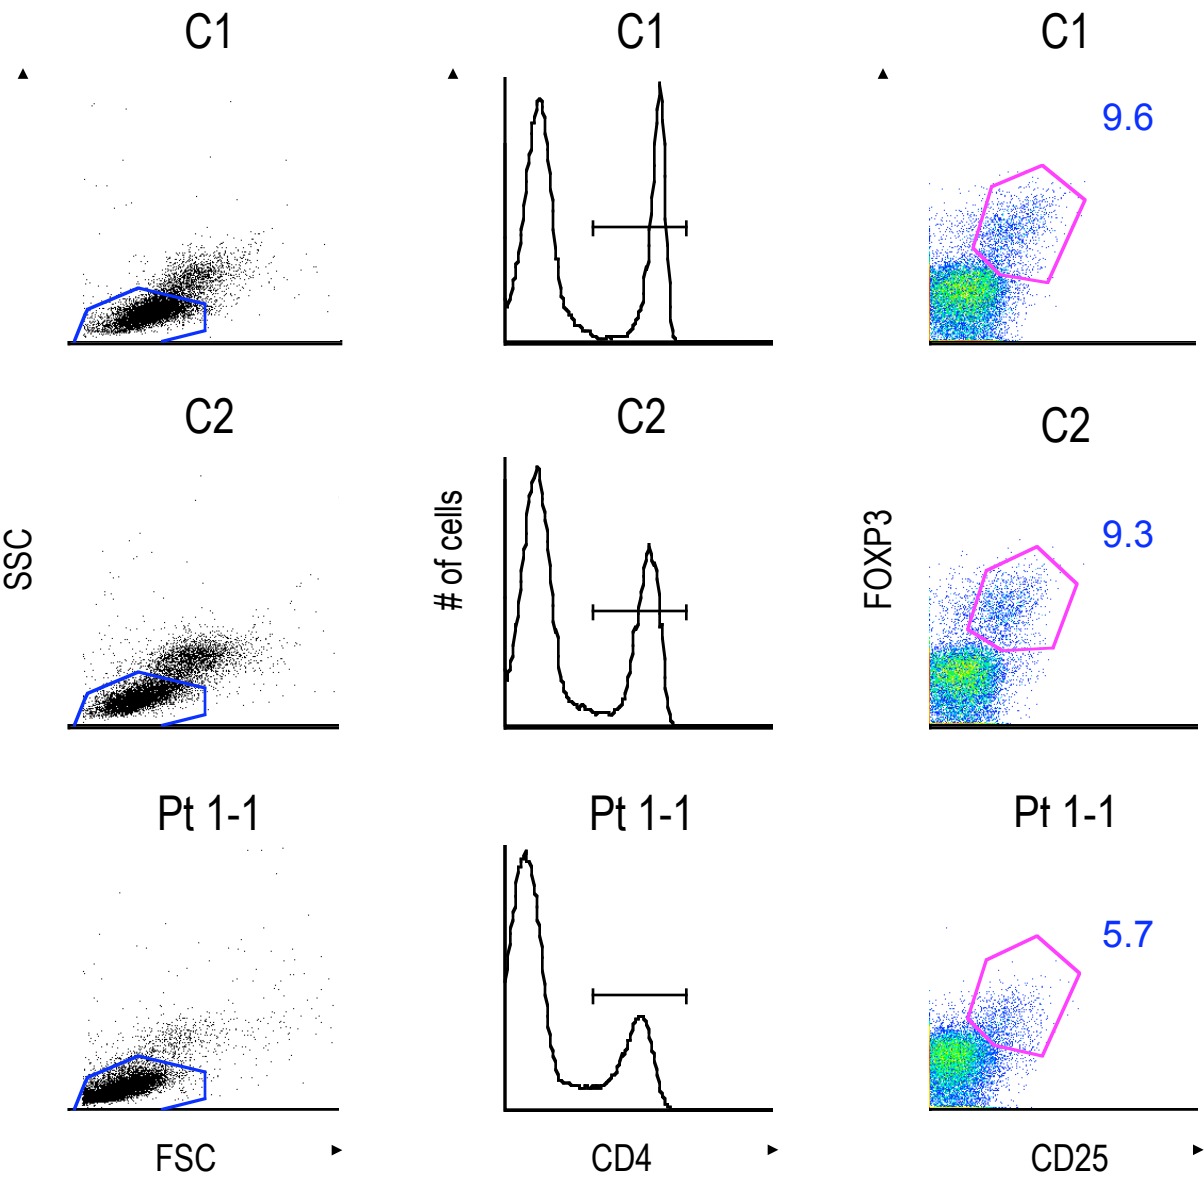



**B**

**Supplemental Figure 1**

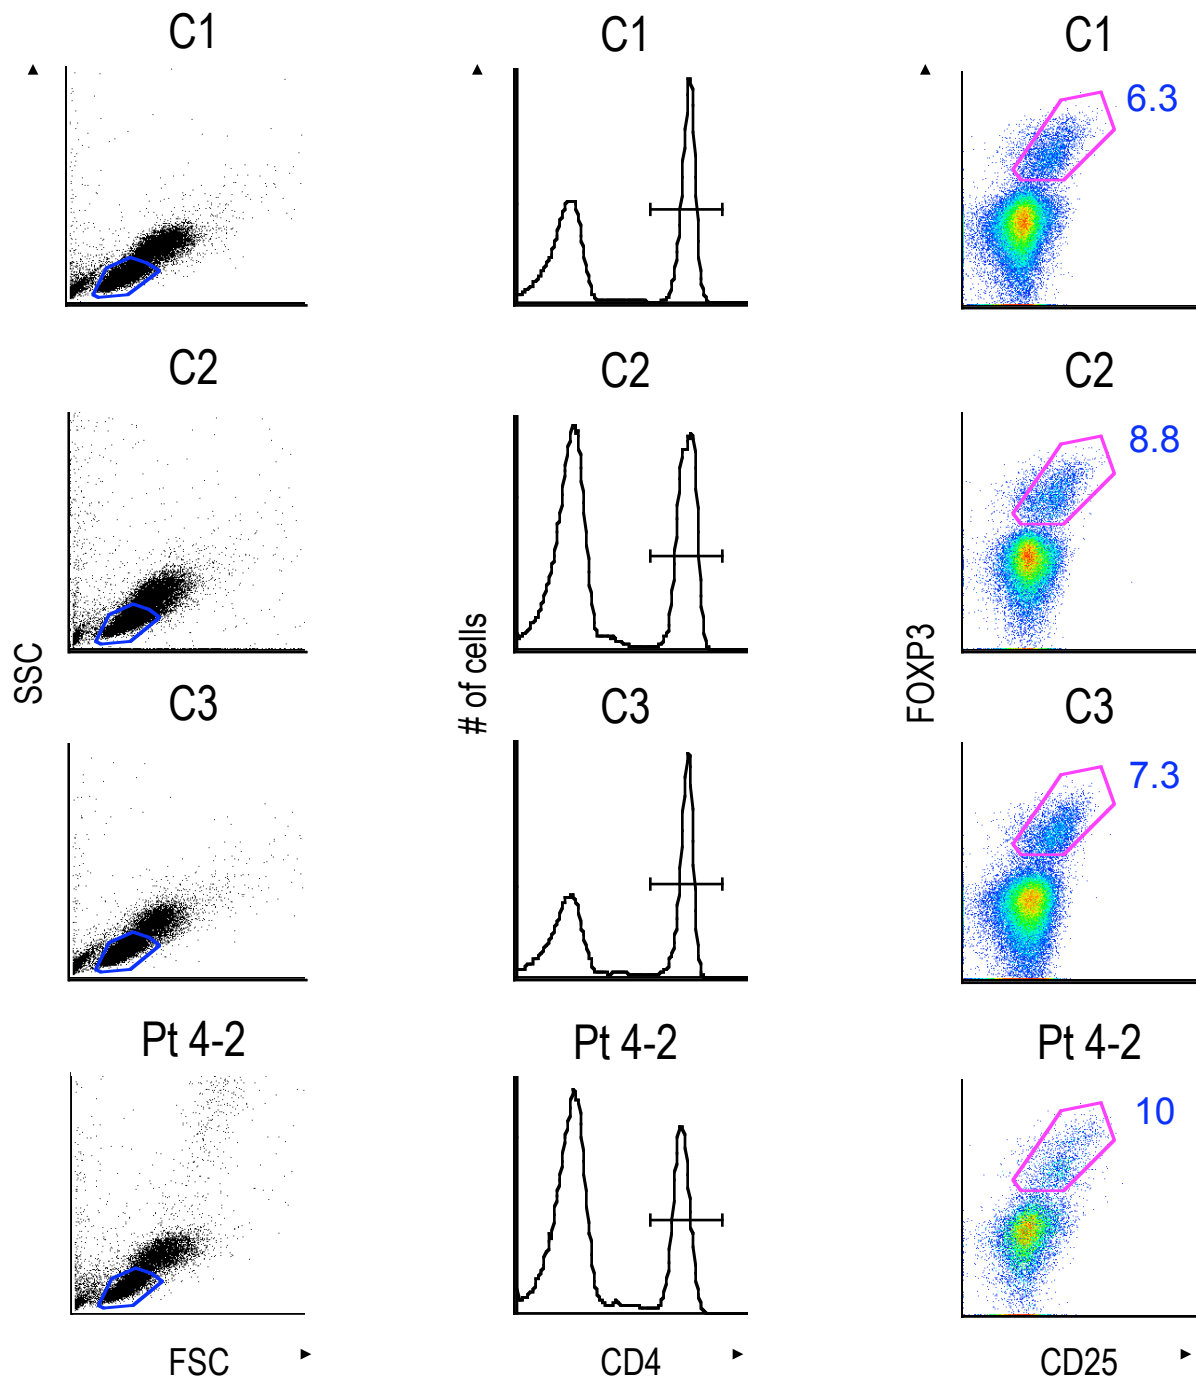

A

# Supplemental Figure 2

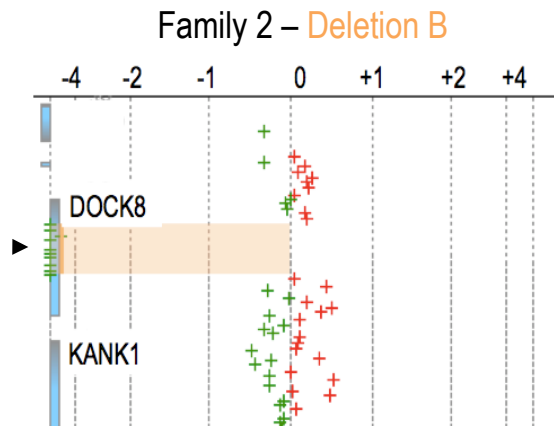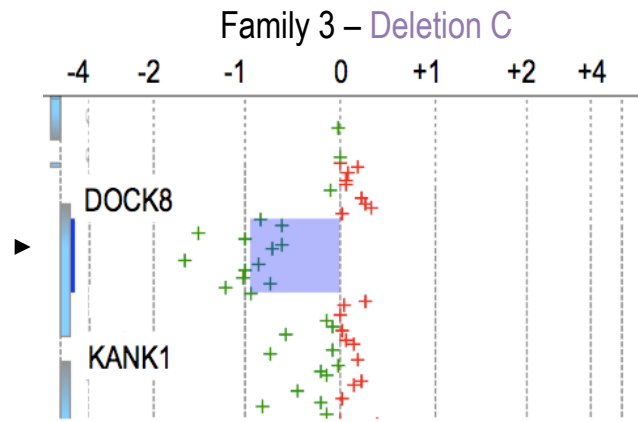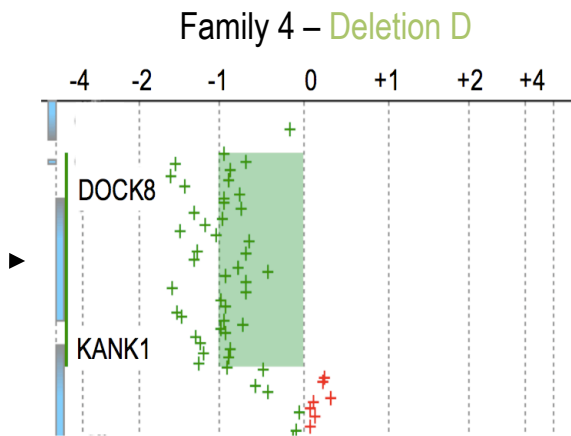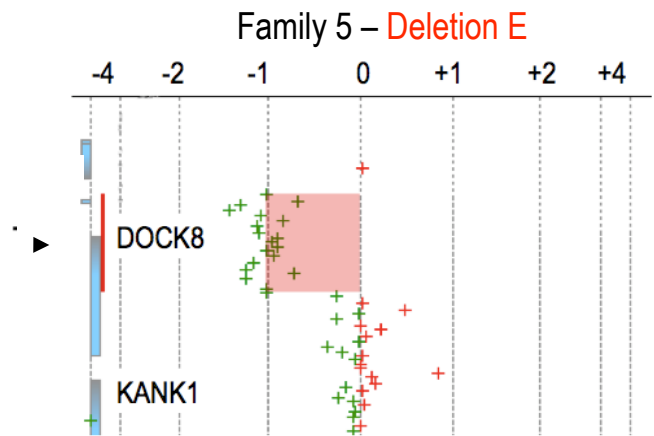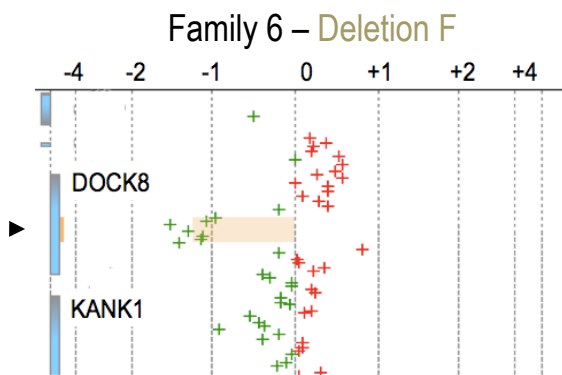

**B**

# Supplemental Figure 2

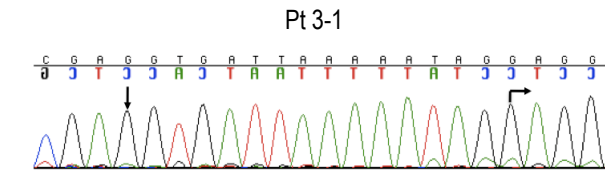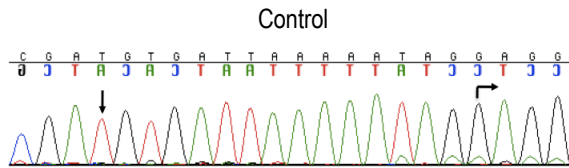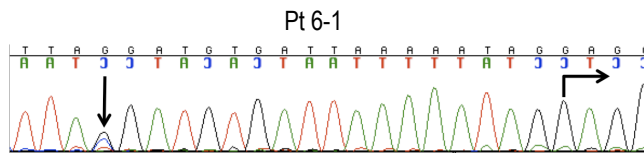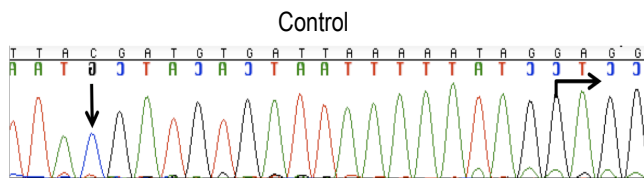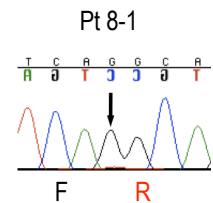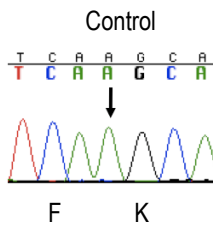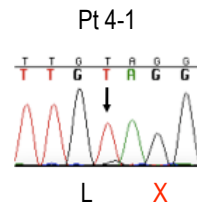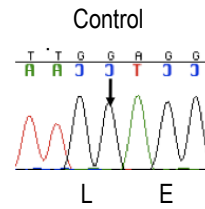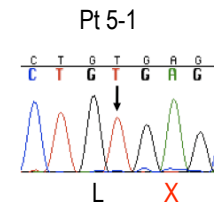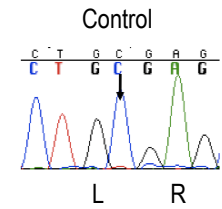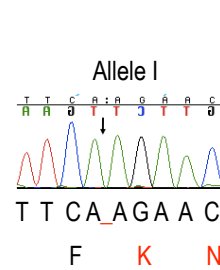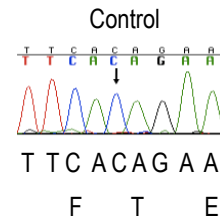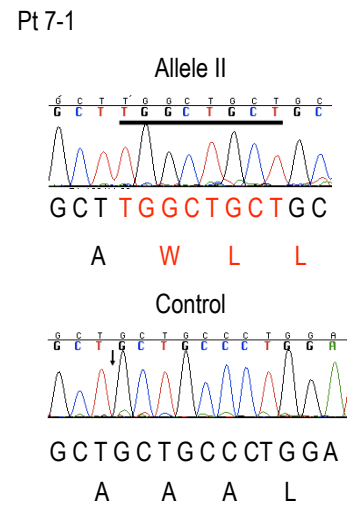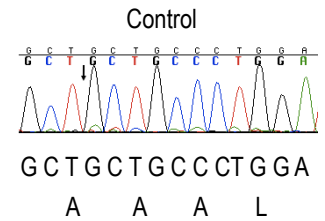

# Supplemental Figure 2

C

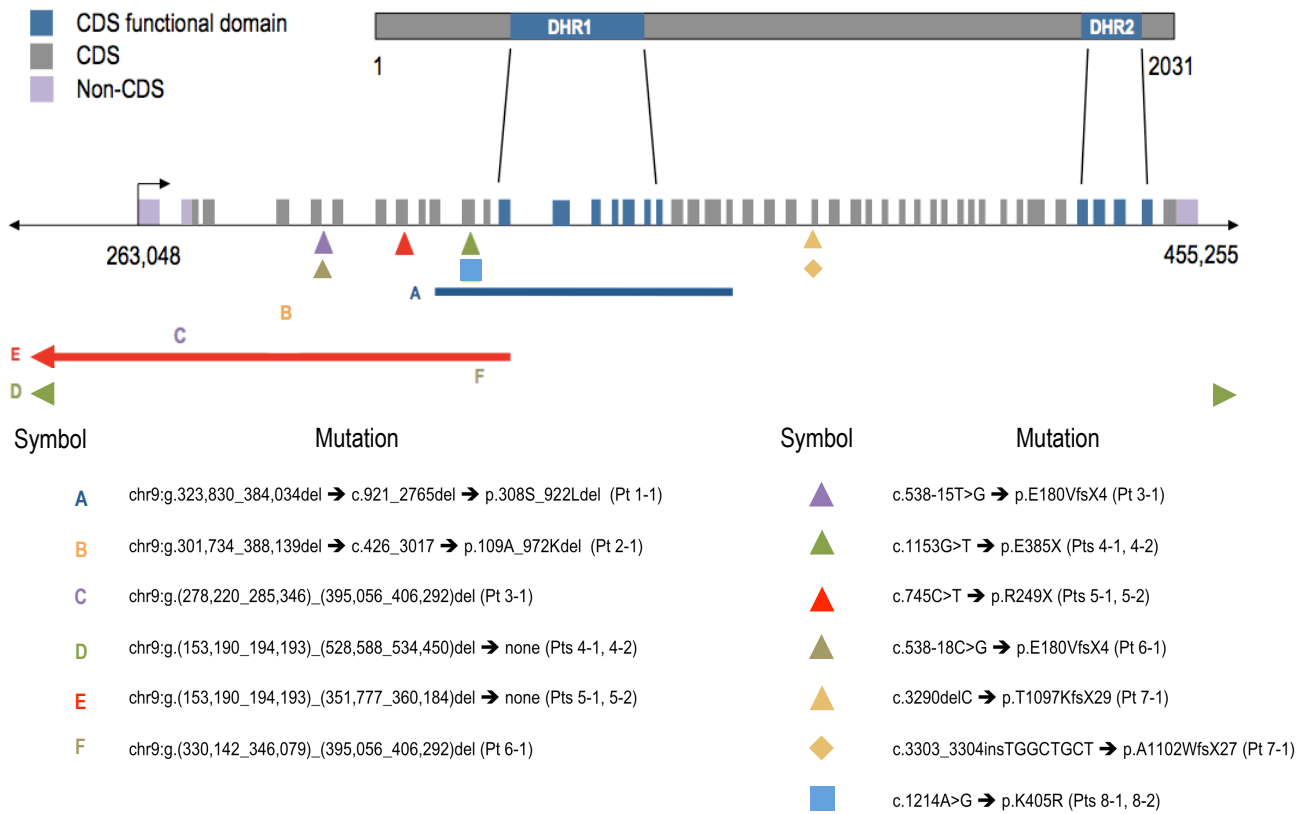

# Supplemental Figure 3

**A**

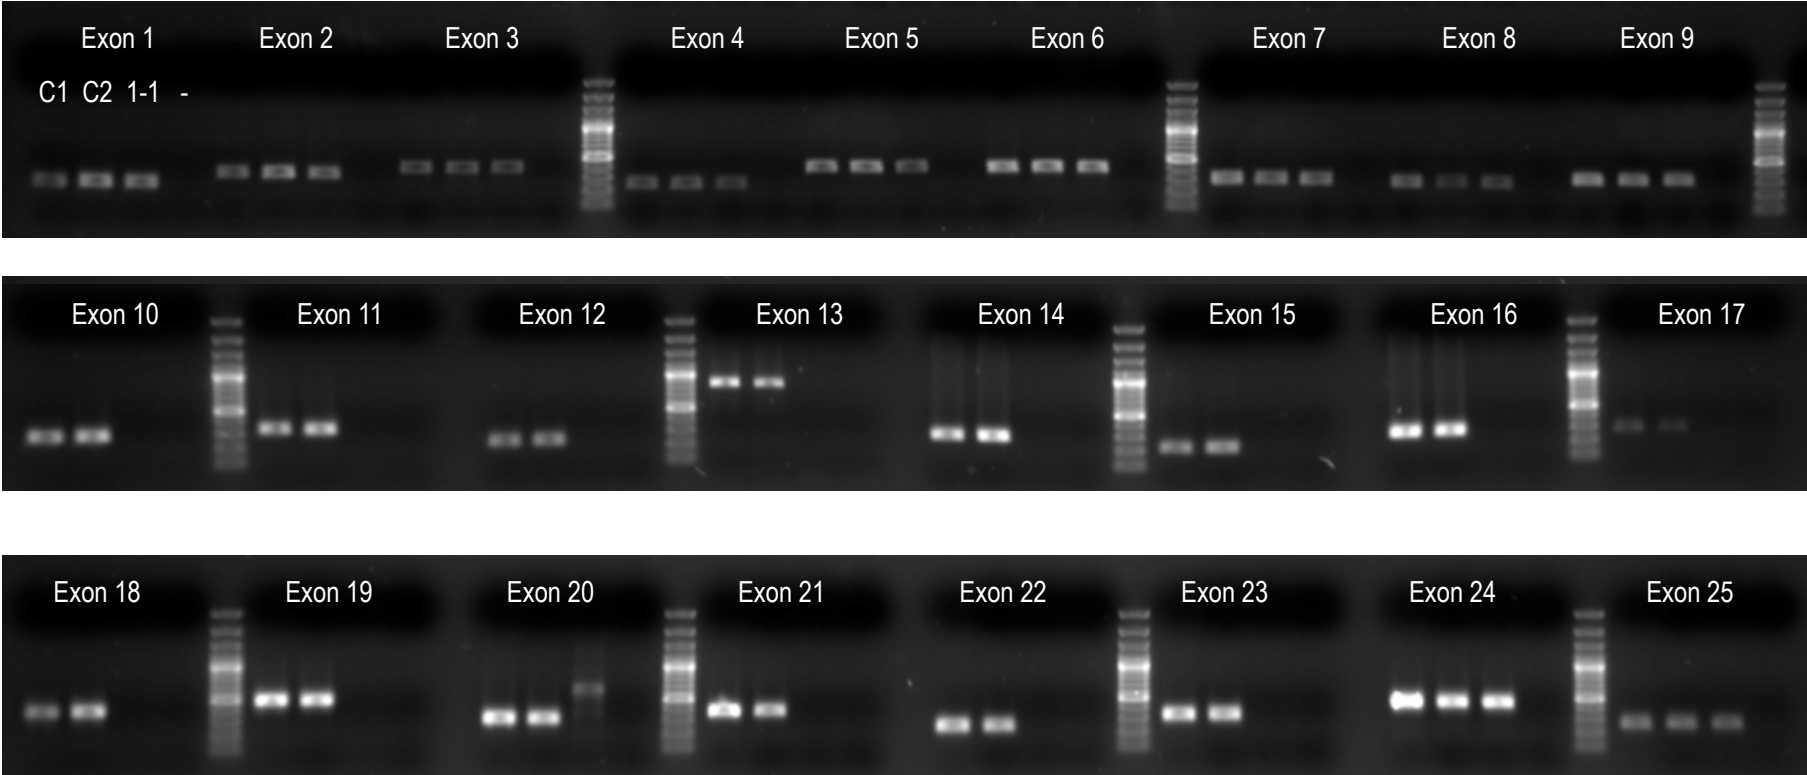

**B**

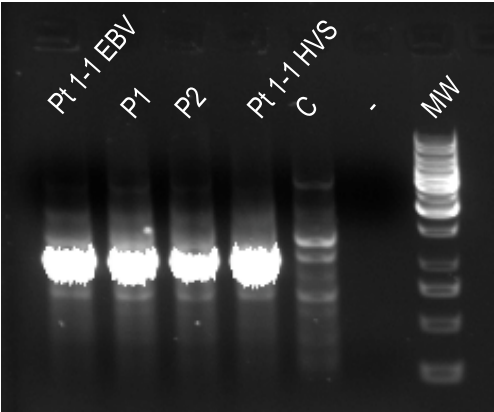

1500bp  
1000  
750  
500  
250

**C**

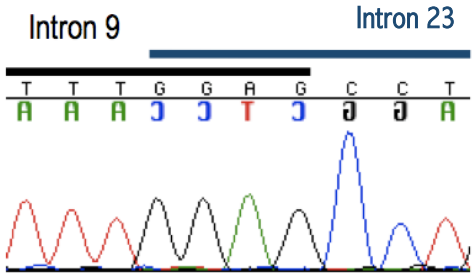

# Supplemental Figure 4

**A**

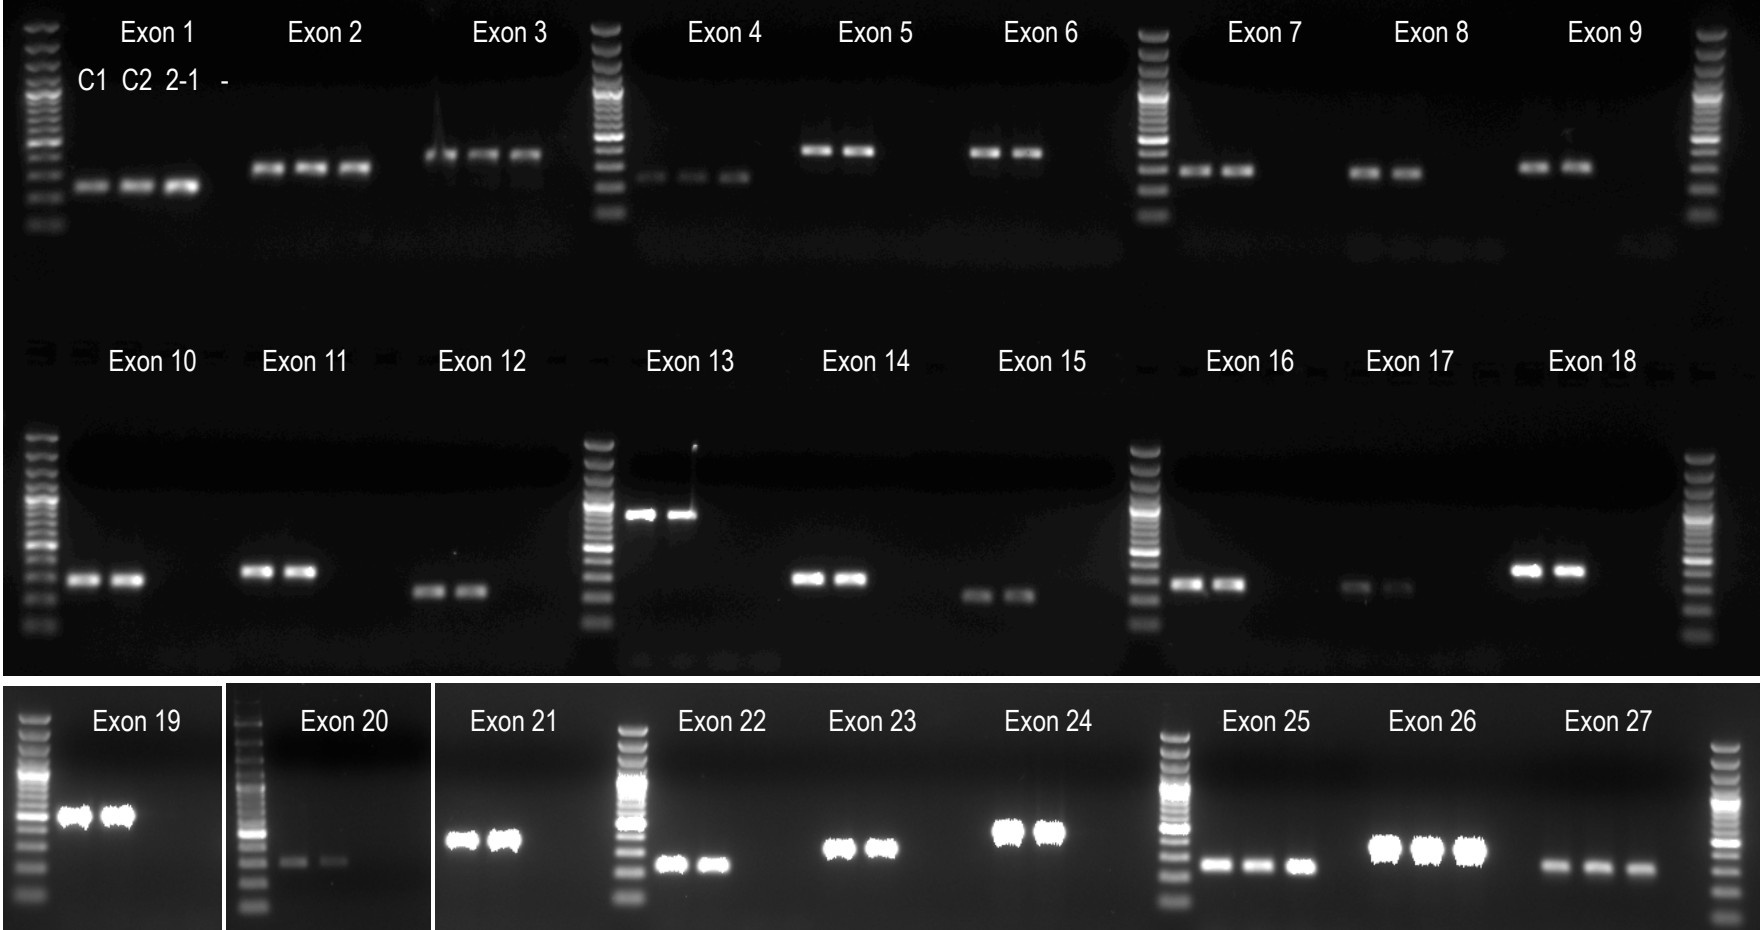

**B**

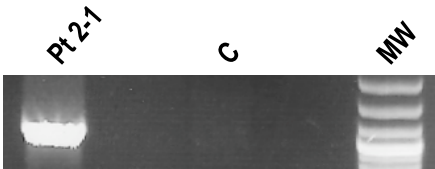

**C**

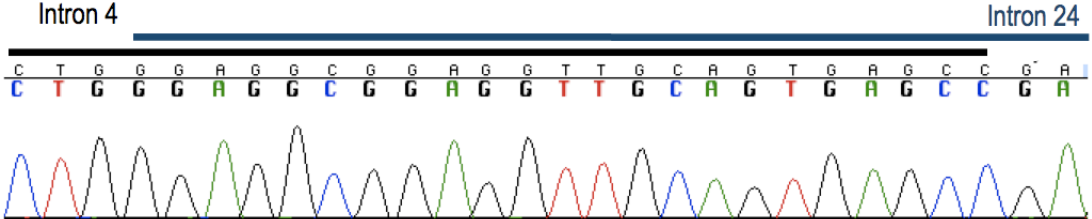

# Supplemental Figure 5

**A**

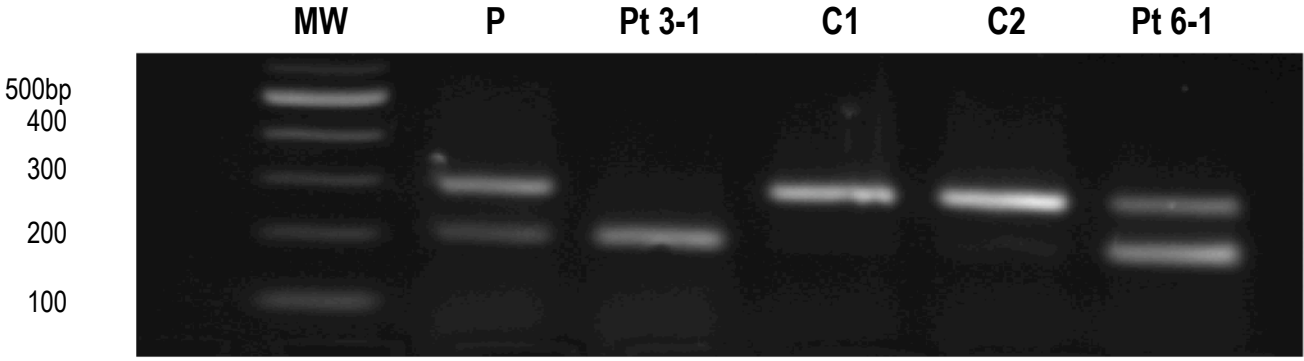

**B**

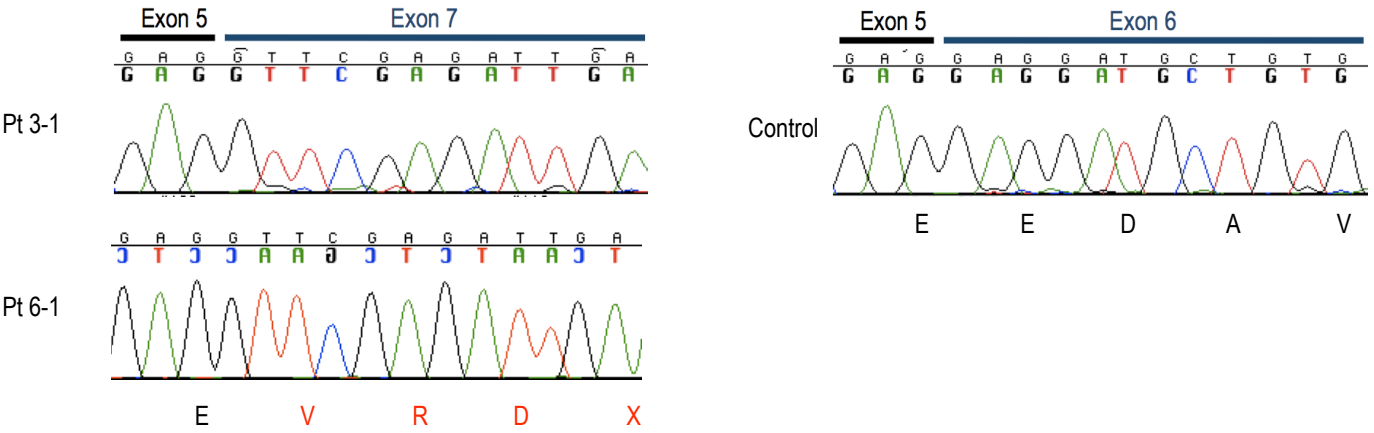

# Supplemental Figure 6

**A**

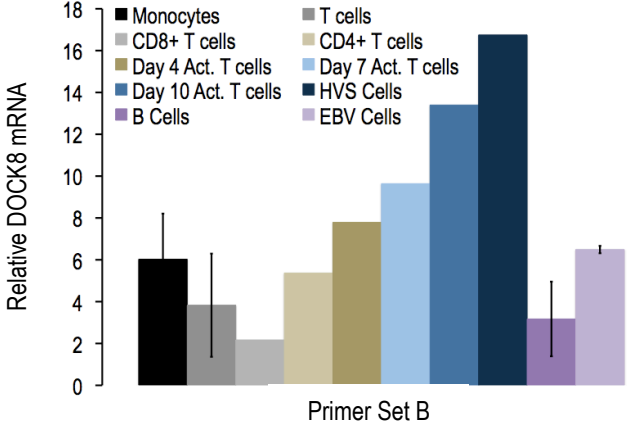

**B**

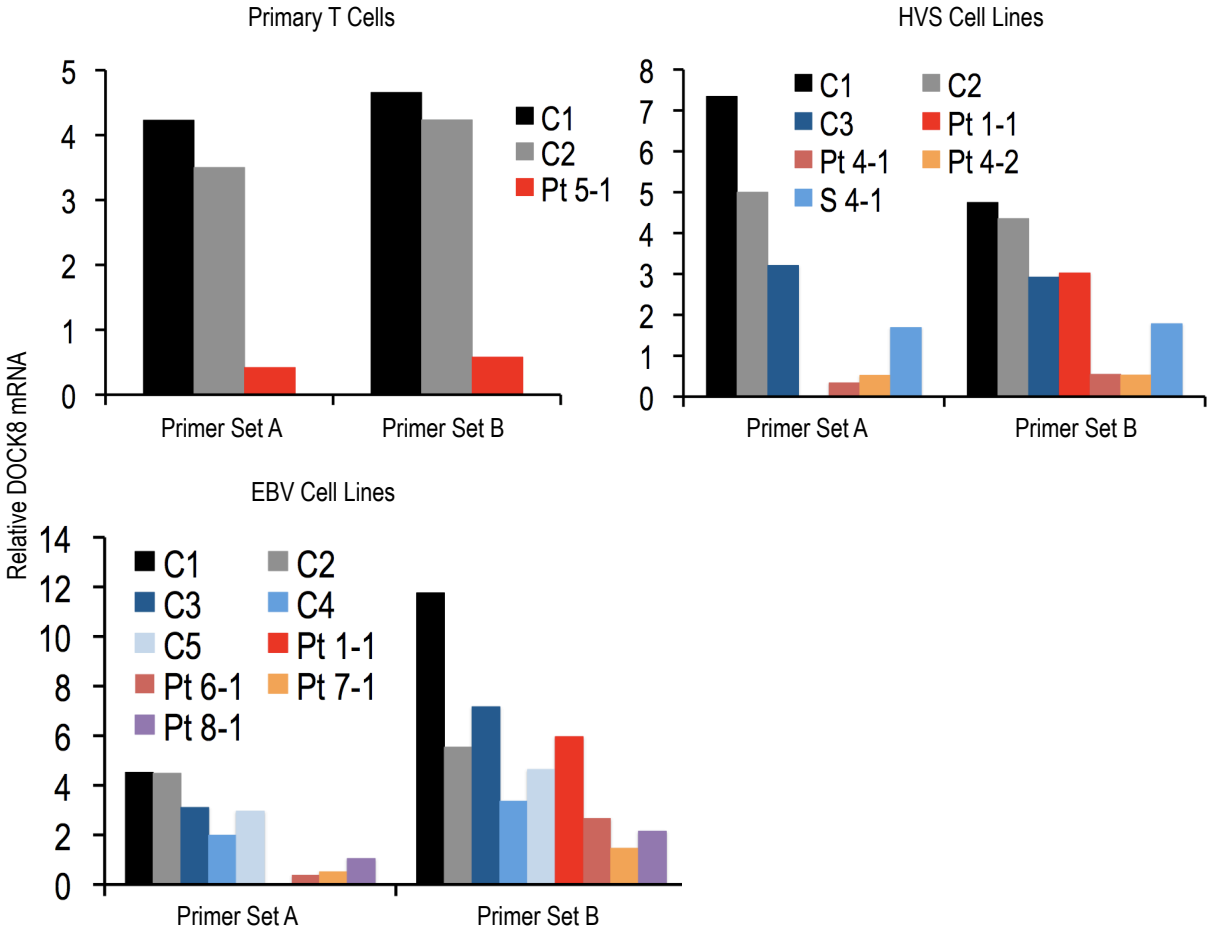

**C**

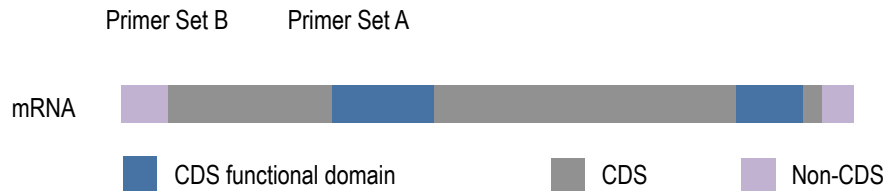



# Supplemental Figure 7

## A

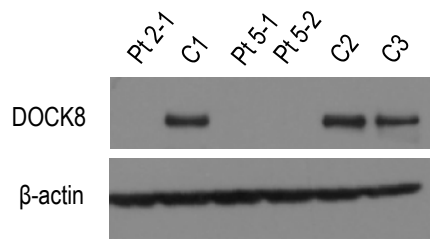

## B

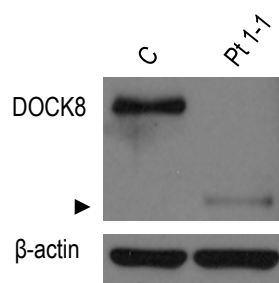

# Supplemental Figure 8

**A**

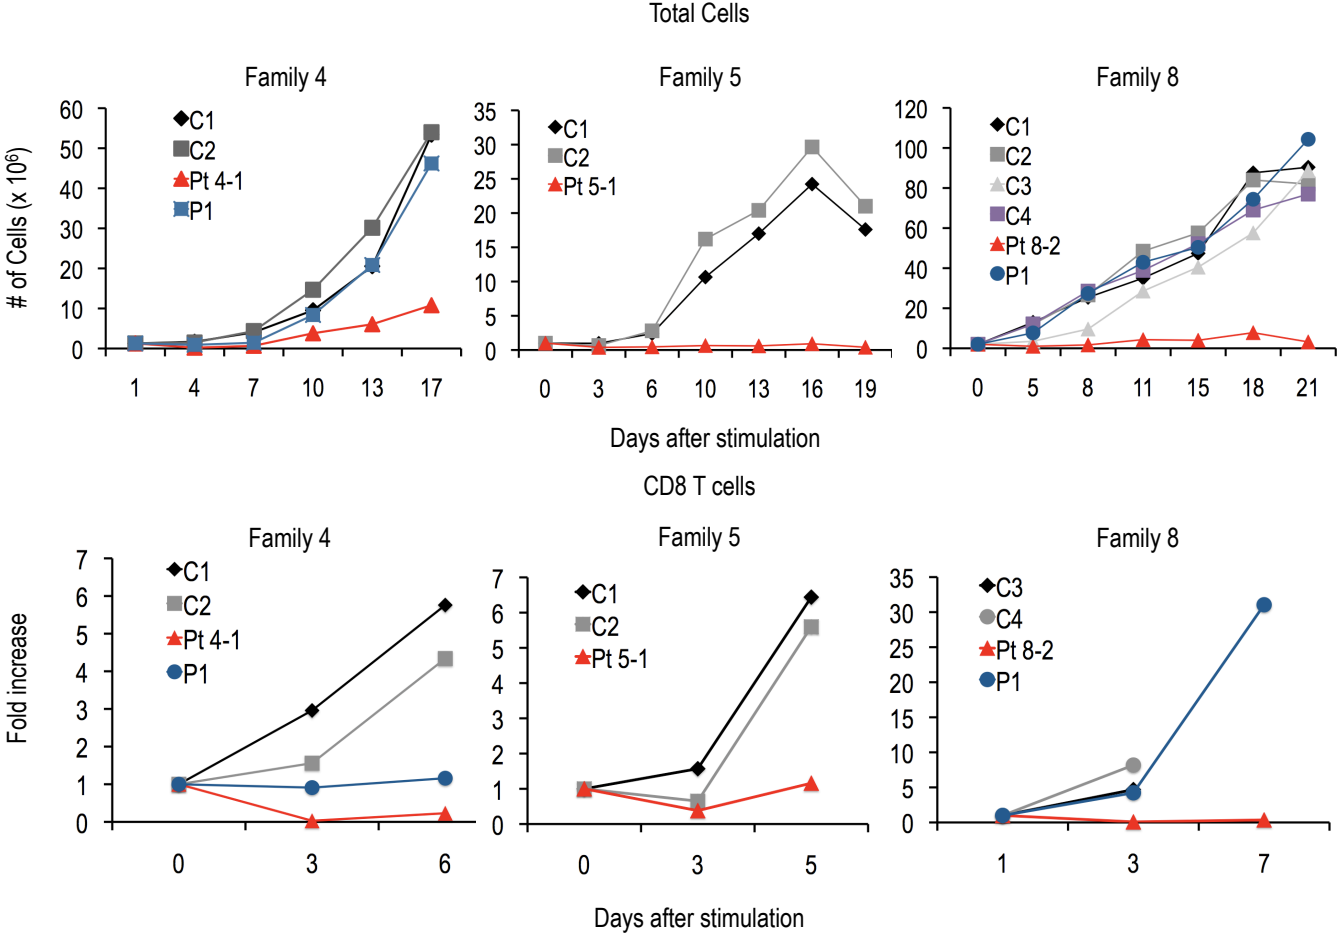

**B**

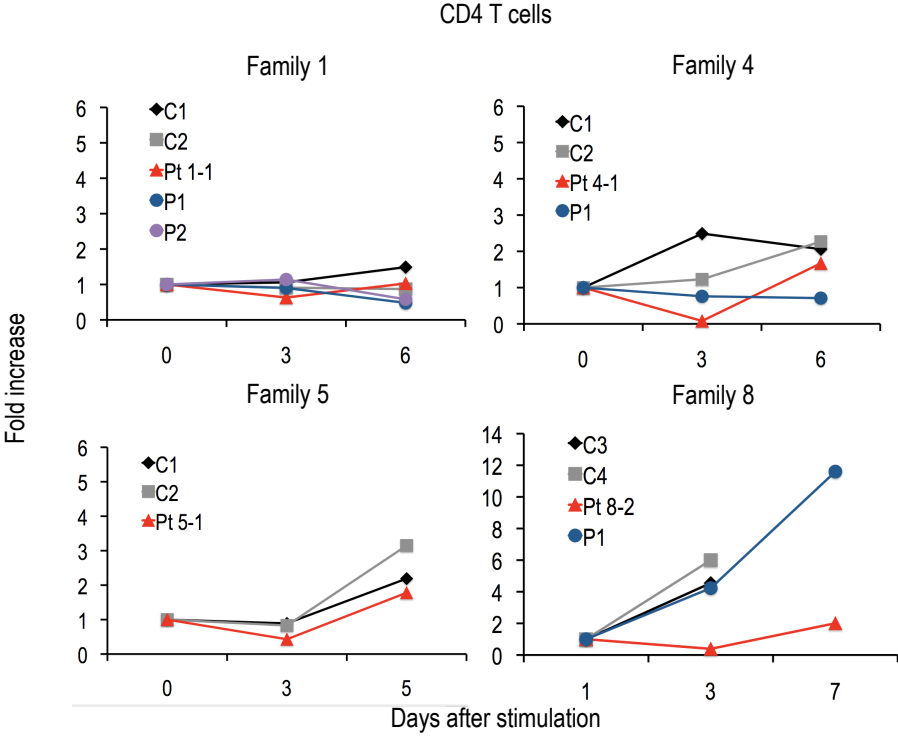

# Supplemental Figure 8

## C

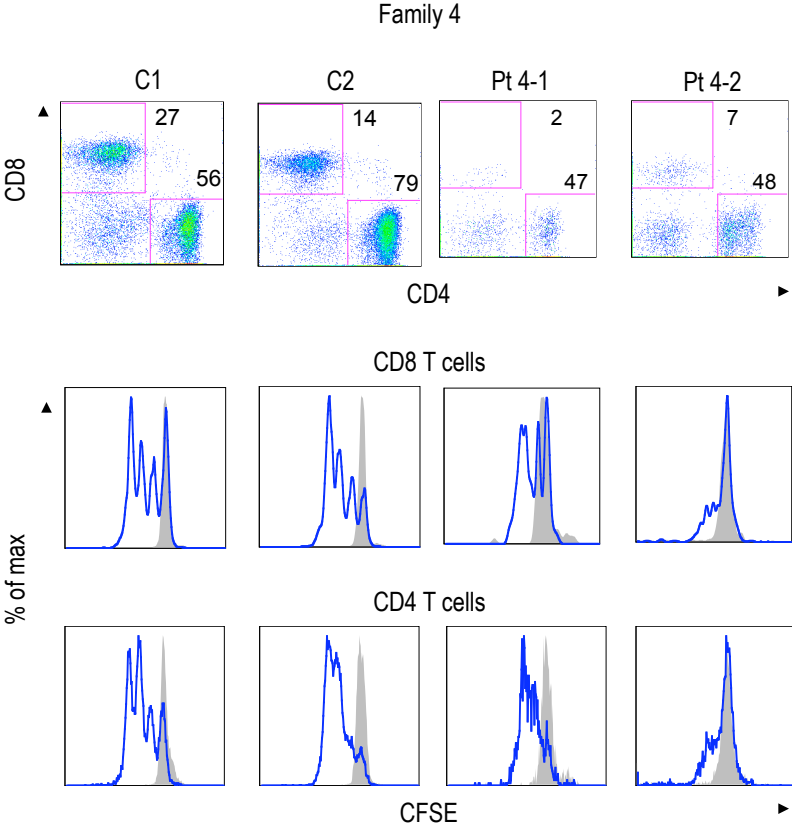

## D

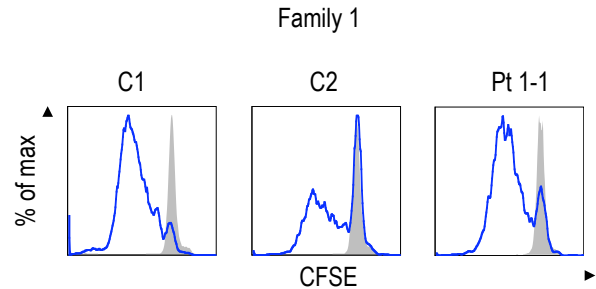

# Supplemental Figure 9

## A

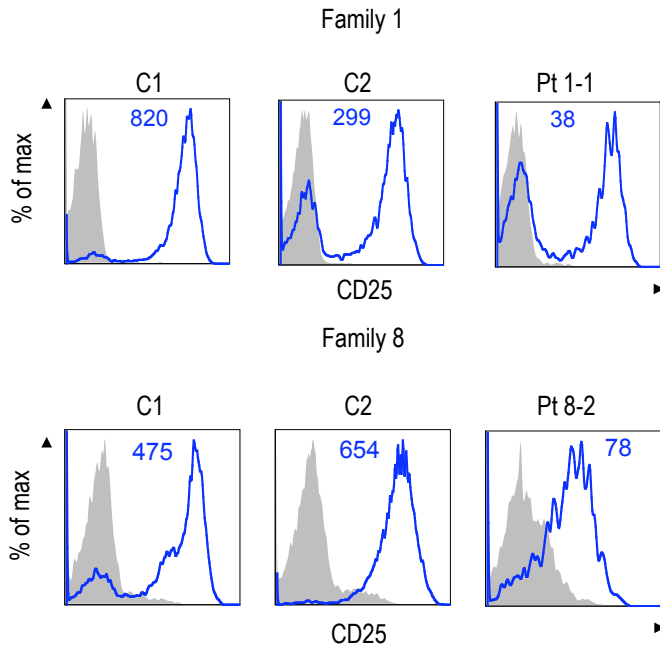

## B

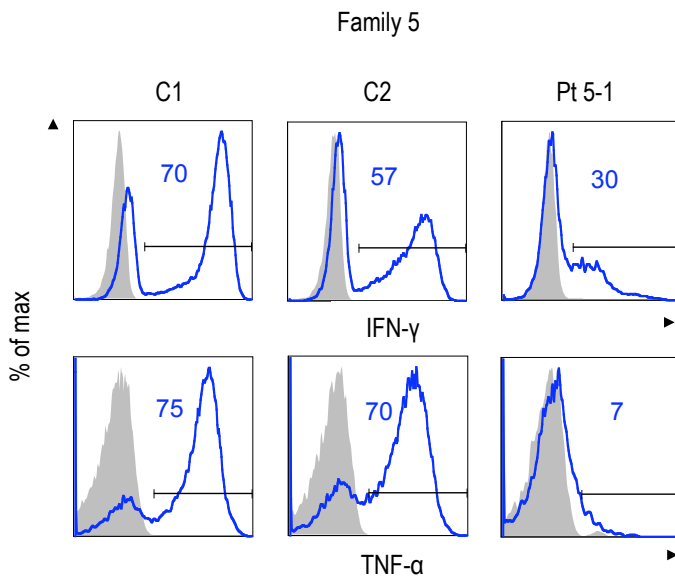

## C

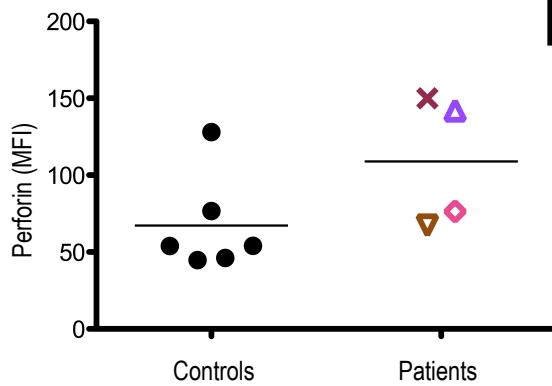

## D

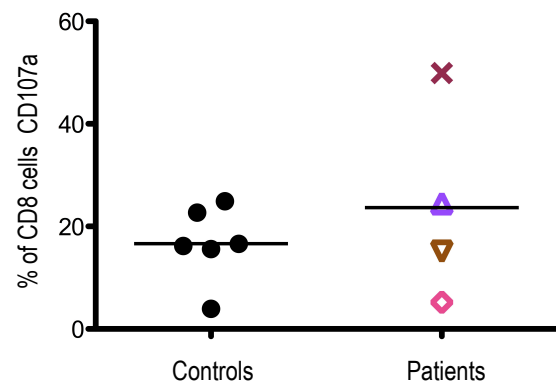

Supplement: NIHMS244353-supplement-supplementary_appendix.pdf [file NIHMS244353-supplement-supplementary_appendix.pdf]
